# Supplementary material for: An analytical verification test for numerically simulated convective flow above a thermally heterogeneous surface
Source: Copernicus journal article supplement (doi:10.5194/gmd-8-1809-2015), 2015-06-18
Supplement: Supplementary file 1 [file gmd-8-1809-2015-supplement.zip]

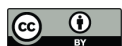

## *Supplement of*

# **An analytical verification test for numerically simulated convective flow above a thermally heterogeneous surface**

**A. Shapiro et al.**

*Correspondence to:* A. Shapiro (ashapiro@ou.edu)

- gmd-8-1809-2015-supplement-cover-letter.pdf
- \_\_MACOSX
  - .\_square.f
- square.f

The copyright of individual parts of the supplement might differ from the CC-BY 3.0 licence.
